# Supplementary material for: Dulaglutide improves glucocorticoid-induced hyperglycemia in inpatient care and reduces dose and injection frequency of insulin
Source: Springer Nature journal article supplement (doi:10.1186/s12902-020-0542-5), 2020-05-07

## **Supplementary Information**

### **Dulaglutide Improves Glucocorticoid-induced Hyperglycemia in Inpatient Care and Reduces Dose and Injection Frequency of Insulin**

Hiroyuki Uchinuma, Masashi Ichijo, Noriyuki Harima and Kyoichiro Tsuchiya

Department of Diabetes and Endocrinology, University of Yamanashi Hospital,  
1110 Shimokato, Chuo, Yamanashi, 4093898, Japan.

## **SUPPLEMENTARY FIGURE LEGEND**

### **Supplementary Figure 1. Injection frequency of bolus insulin at each meal.**

The number of patients with (black bar) or without (white bar) bolus insulin injection at each meal at maximal insulin dose (Max) and discharge. \*  $p < 0.05$  and \*\*  $p < 0.01$  vs. Max of the same group. #  $p < 0.05$ , ##  $p < 0.01$ , and ###  $p < 0.001$  vs. non-Dula group.

# Supplementary Figure 1

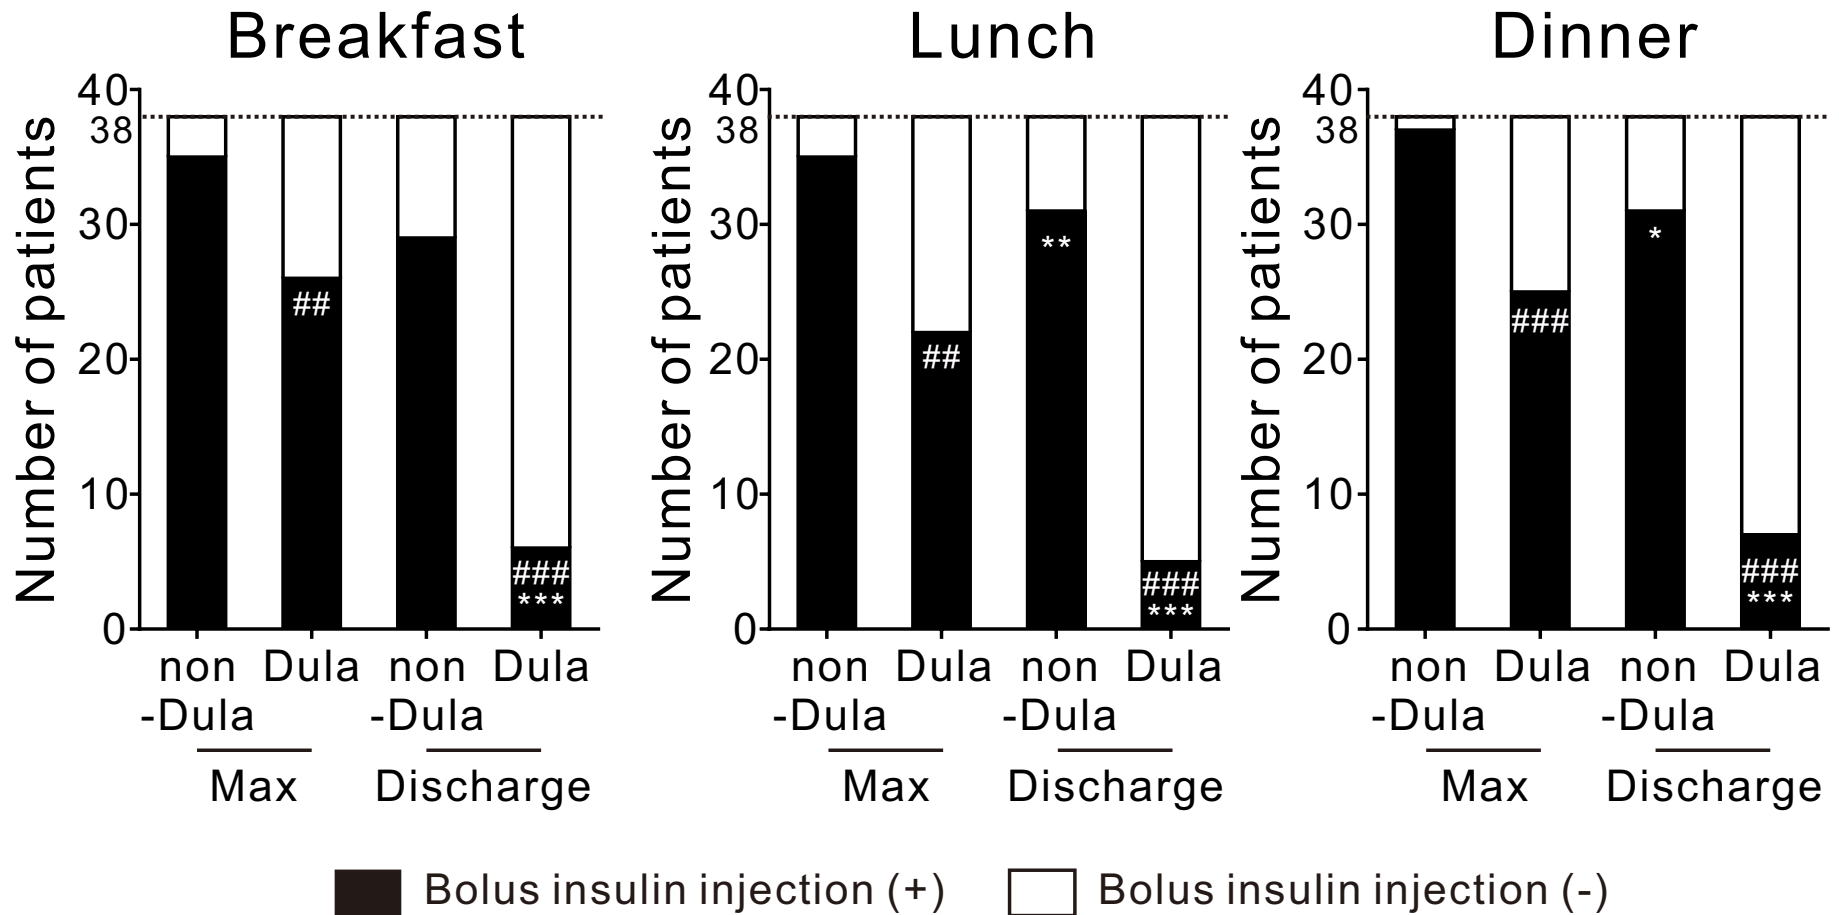

Supplement: MOESM1 [file 17962624]
